# Supplementary material for: The Influence of Commercial Feed Supplemented with Carnobacterium maltaromaticum Environmental Probiotic Bacteria on the Rearing Parameters and Microbial Safety of Juvenile Rainbow Trout
Source: MDPI journal article supplement (doi:10.3390/ani12233321), 2022-11-28
Supplement: s1 [file s1]

**Table S1.** The identification of an environmental strain of *Carnobacterium maltaromaticum* bacteria based on 16S rDNA sequence analysis.

| Results of identification            | 16S rDNA genes sequence                                                                                                                                                                                                                                                                                                                                                                                                                                                                                                                                                                                                                                                                                                                                                                                                                                                                                                                                                                                                                                                                                                                                                                                                                         | E-value |
|--------------------------------------|-------------------------------------------------------------------------------------------------------------------------------------------------------------------------------------------------------------------------------------------------------------------------------------------------------------------------------------------------------------------------------------------------------------------------------------------------------------------------------------------------------------------------------------------------------------------------------------------------------------------------------------------------------------------------------------------------------------------------------------------------------------------------------------------------------------------------------------------------------------------------------------------------------------------------------------------------------------------------------------------------------------------------------------------------------------------------------------------------------------------------------------------------------------------------------------------------------------------------------------------------|---------|
| <i>Carnobacterium maltaromaticum</i> | CGCACGAAGTTGAAGAGCTTGCTCTTTAACCAAGTGAGTGGCGGACGGGTGAGTA<br>ACACGTGGGTAACCTGCCCATTAGAGGGGGATAACATTCGGAAACGGATGCTAAT<br>ACCGCATAGTTTCAGGAATCGCATGATTCTTCCAATGGAAAGGTGGCTTCGAAGCT<br>ACCACTAATGTTTGATGAGCACACACGGCCCGCCACTAGCTATGTTCTGGGCCCT<br>TGCAGGTAAGTGGCGCACCAAGGCAATGATACGTAGCCGACCTGAGAGGGTGATC<br>GGCCACACTGGGACCGAAGTACATCCGCCCAGACTCCTACGGGAGGCTAGGCAGT<br>AGGGAATCTTACCGAAATGCACGAAAGTCTGAACCGGAGCAACTGCAACGCGTGA<br>GCGAACAAGGTTTACGGATCGTAAAACTCTGTTGTTAAAGAAGAACAAGCATCGA<br>GAGTAACAGCTCATTCCCCTGTACGGTACTAAACTGCAGAAAGCCACGGCTGGAA<br>CGACGTGCCAAACAGTGGCCGTCAGAGTAATACGTACGGGTGGCAAGCGTTACG<br>ACCGTTGATCATTATTGGGCCCAAAGCGAGCAACAGCCCTGAATTCGGTTGTAGAG<br>TGCTGATGCTCGAAAGCCCCCGGCTCAACCGGGGAGGATCAGTGGAACAGGAGA<br>ATCCCTTTCGAGATAGCAGATCTCACCAGGTTCTACAGTTCTGGACCATTCCAAG<br>AGTAGCGCAACGAAATGCGTAGATATGGTGTACGAGGTGGCGAACACGCCCAGGG<br>GCAGTTAAGGAAACTCAAAGGTCGGTAACTGACGGCATGAGGGGTCCGCCTCACG<br>AATTACGCAATCGACGTCGTGACTTCCCGCCTTTGGGAGGTTGTGAATCGTGAGTA<br>GCAAATGCCGCACCTGATGGTCCCATAGATTAGGACAAACGAGGGGTGCGAAAGC<br>TCGGAGTCGCAGTCAATGTCTGGTCTCTCAGCGGAAGCGGTGACCACAAGGAGGT<br>GTATAGATGCGTAAAGTGGCGATGTGCACCTTAAGGTGAGAGGAGAAGACGTGAG<br>TTCAAGAGGTCAAAGGTTACTGGGAGGGGCCAACTCGGCCCCCGAAAGTG TAGTC<br>TGAATTTCTTGCGGACG | 1.0     |
